# Supplementary material for: Early Human Prostate Adenocarcinomas Harbor Androgen-Independent Cancer Cells
Source: PubMed Central journal article supplement (PMC3783414; doi:10.1371/journal.pone.0074438), 2013-09-25

## Supplementary FIGURE S1.

### Prostate Stem/Progenitor Markers Expressed by PrCa Cell Colonies.

**Legend to Figure S1.** Prostate CCC and surrounding prostate epithelial PrCa cells expressed: **(A)** p63 (red); **(B)** cytokeratin 8/18 (CK8/18) (red); **(C)** c-kit (red). For each, CD44 staining (green) is shown in the middle panel, with nuclei detected by DAPI (blue). Merged images are shown in the bottom panels. Flow-cytometry of other markers is presented for pooled PrCa cells and CCCs in Fig 2 in the main text, namely: CK5/14 (~48% positive); CD44 (~98% positive); and CD133 (~38% positive). Expression of CD133 decreased rapidly in later colony transfers, which correlates with differentiation of the cells and the progressive dilution of CD133<sup>+</sup> CCCs, relative to more rapidly proliferating CD133<sup>lo/-</sup> PrCa cells.

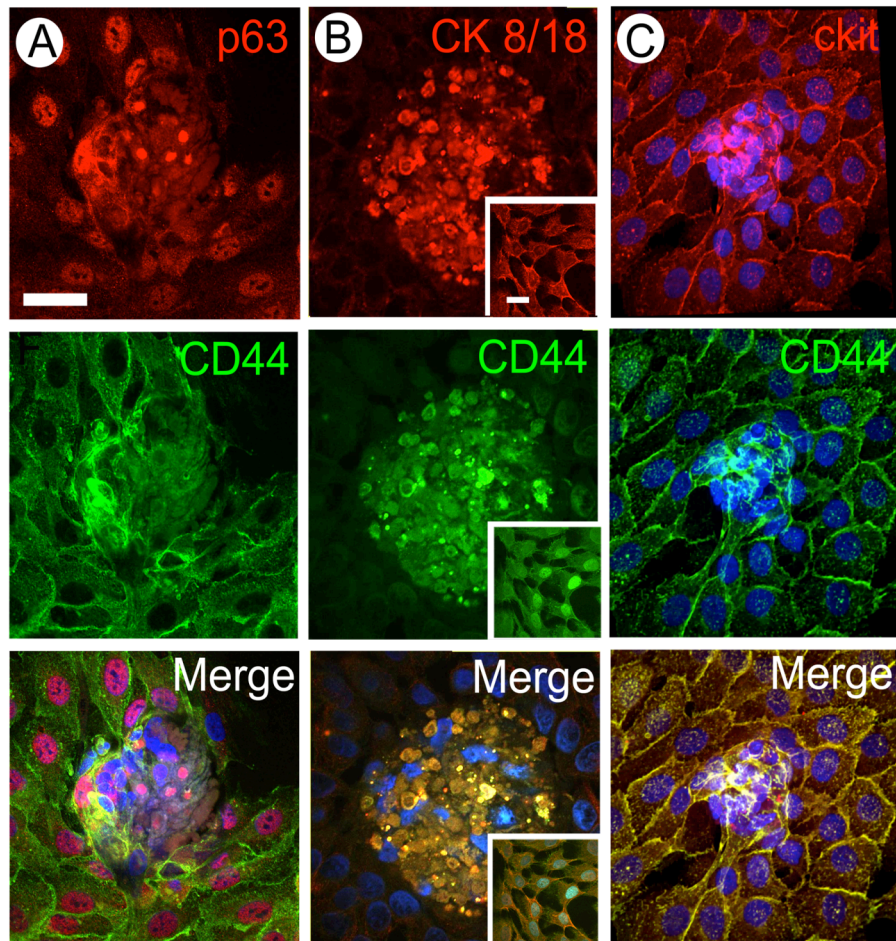

Supplement: pone.0074438.s001.pdf [file pone.0074438.s001.pdf]
