# Supplementary material for: Early Human Prostate Adenocarcinomas Harbor Androgen-Independent Cancer Cells
Source: PubMed Central journal article supplement (PMC3783414; doi:10.1371/journal.pone.0074438), 2013-09-25

## Supplementary FIGURE S2.

### Predominant Expression of Aldehyde Dehydrogenase 7A1 by PrCa Cell Cultures.

**Legend to Figure S2.** Indirect immunofluorescent staining of Prostate Cancer Cells (Pr#87) with antisera specific for ALDH isotypes 1A3 and 7A1 and non-immune rabbit control serum. PrCa cells (Pr#87) were grown on coverslips, fixed in methanol and stained with rabbit anti-bodies to ALDH1A3 (A), ALDH7A1 (B), and non-immune rabbit serum (C). Scale bars = 50  $\mu$ m.

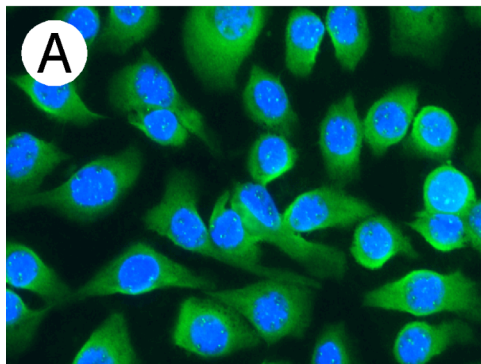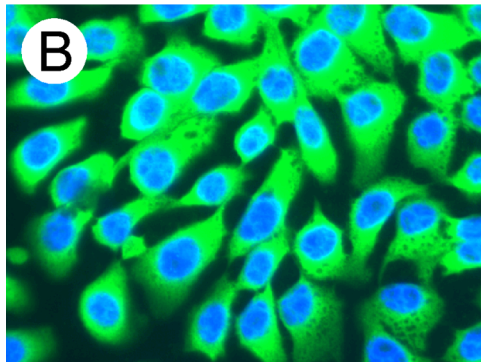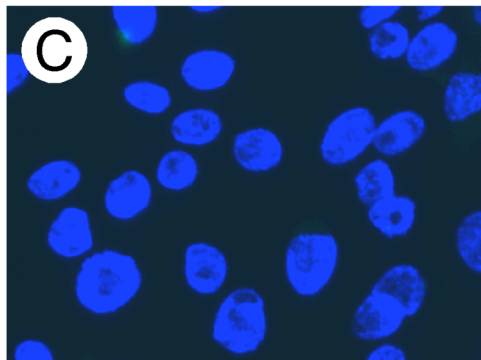

Supplement: pone.0074438.s002.pdf [file pone.0074438.s002.pdf]
