# Supplementary material for: Early Human Prostate Adenocarcinomas Harbor Androgen-Independent Cancer Cells
Source: PubMed Central journal article supplement (PMC3783414; doi:10.1371/journal.pone.0074438), 2013-09-25

**Supplementary FIGURE S3.**

**Histologic Appearance of Local Cancer Induced by Xenotransplantation.**

**Legend to Figure S3.** (A) Micrograph of the histological appearance of local cancer generated by orthotopic xenografting of only PrCa cells (no added rat UGM cells). (B) Comparison with the histologic picture of the Stage I cancer of the patient donating the specific cultured prostate cancer tissue. Note the tendency to form back-to-back glands and gland-within-gland structures. Cells with nucleoli are common.

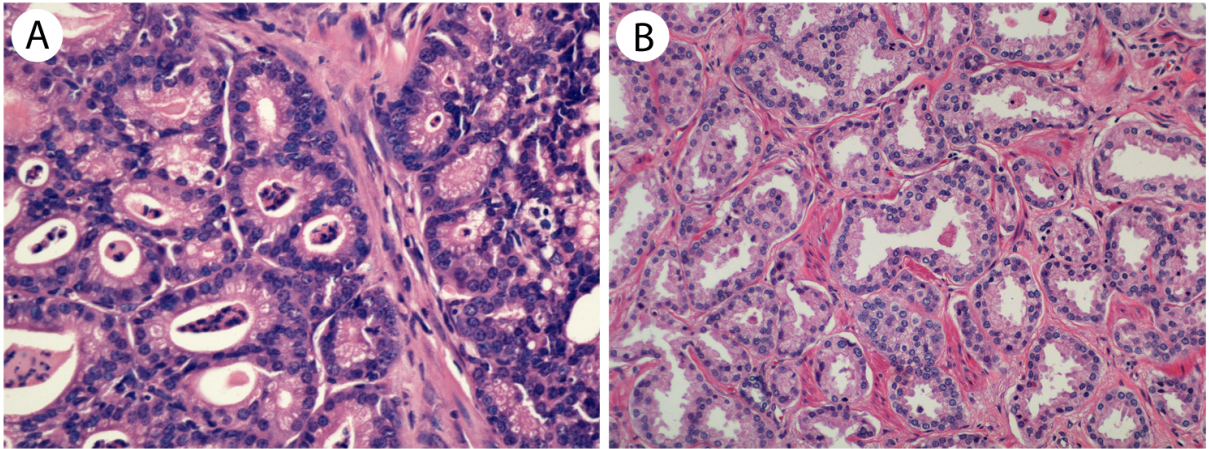

Supplement: pone.0074438.s003.pdf [file pone.0074438.s003.pdf]
