# Supplementary material for: Early Human Prostate Adenocarcinomas Harbor Androgen-Independent Cancer Cells
Source: PubMed Central journal article supplement (PMC3783414; doi:10.1371/journal.pone.0074438), 2013-09-25

## Supplementary FIGURE S4.

### UGM-Mediated Tissue Recombination of PrCa Cells.

**Legend to Figure S4.** UGM-mediated tissue recombination of PrCa cells transplanted under the kidney capsule of SCID recipients stimulates slow-growing glands with simple epithelium. Glandular structures were observed after subcapsular renal engraftment of PrCa cells with rat embryonic urogenital mesenchyme, as seen after H&E staining (A). Cells in these glands expressed the epithelial marker E-cadherin (B) and basal cell marker p63 (C). (D) A human-specific mitochondrial antibody. Insets in B, C, and D show relative staining of positive-controls. Glands were negative for CD44, CD133, PSA, and AMACR (data not shown). Scalebars = 100  $\mu\text{m}$ .

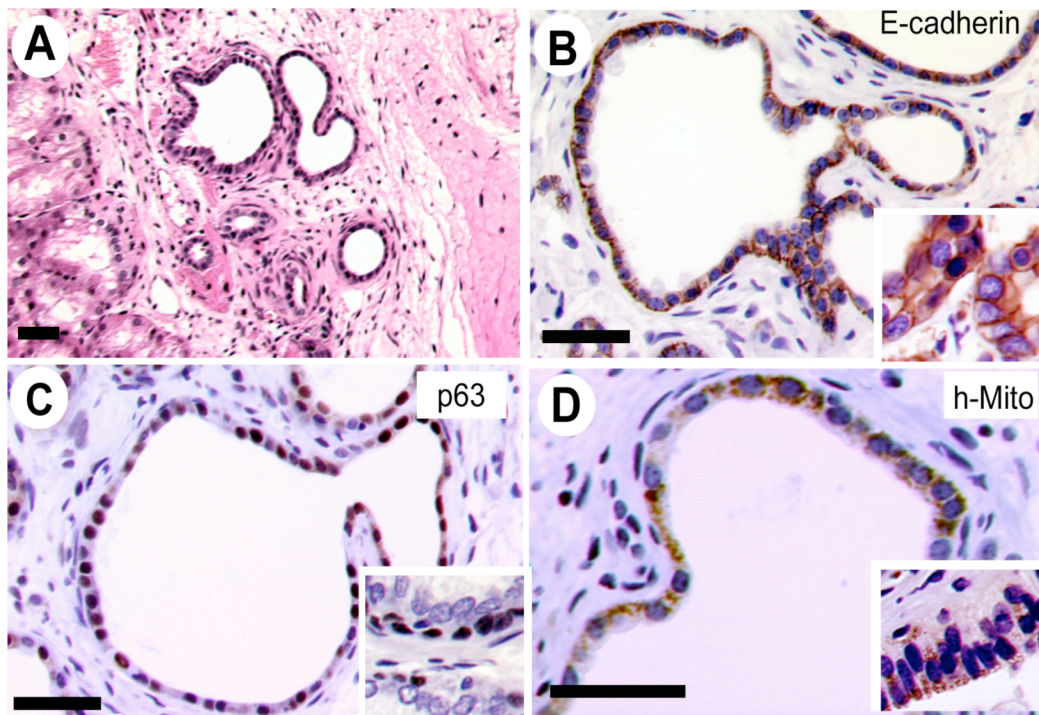

Supplement: pone.0074438.s004.pdf [file pone.0074438.s004.pdf]
