# Supplementary material for: Early Human Prostate Adenocarcinomas Harbor Androgen-Independent Cancer Cells
Source: PubMed Central journal article supplement (PMC3783414; doi:10.1371/journal.pone.0074438), 2013-09-25
Supplement: pone.0074438.s007.pdf [file pone.0074438.s007.pdf]

**Supplementary TABLE S1. Culture of Representative Prostate Cancer Tissue Samples.**

| Lab ID | Primary Gleason Grade | Secondary Gleason Grade | Gleason Score | Sample Histology                                                           | Number colonies from 50 mg dispersed tissue |
|--------|-----------------------|-------------------------|---------------|----------------------------------------------------------------------------|---------------------------------------------|
| 3      | 3                     | 4                       | 7             | Adenocarcinoma. High-grade PIN. Glandular hyperplasia.                     | 4                                           |
| 4      | 4                     | 3                       | 7             | Adenocarcinoma. High-grade PIN. Glandular atrophy.                         | 68                                          |
| 6      | 3                     | 4                       | 7             | Adenocarcinoma. BPH.                                                       | 0                                           |
| 8      | 4                     | 4                       | 8             | Adenocarcinoma. Extensive high-grade PIN.                                  | 0                                           |
| 9      | 4                     | 5                       | 9             | Adenocarcinoma. High-grade PIN.                                            | 120                                         |
| 12     | 3                     | 4                       | 7             | Adenocarcinoma. BPH. PIN. Stromal hyperplasia.                             | 200                                         |
| 13     | 3                     | 4                       | 7             | Adenocarcinoma. Extensive high-grade PIN.                                  | 260                                         |
| 14     | 3                     | 4                       | 7             | Adenocarcinoma. High-grade PIN. Atrophy.                                   | 0                                           |
| 15     | 4                     | 4                       | 8             | Adenocarcinoma. Basal cell hyperplasia.                                    | 0                                           |
| 22     | 3                     | 3                       | 6             | Adenocarcinoma. Glandular and stromal hyperplasia.                         | 0                                           |
| 27     | 3                     | 3                       | 6             | Adenocarcinoma. Glandular hyperplasia. Stromal hyperplasia.                | 0                                           |
| 28     | 4                     | 4                       | 8             | Adenocarcinoma. High-grade PIN.                                            | 0                                           |
| 31     | 3                     | 3                       | 6             | Adenocarcinoma. Basal cell hyperplasia. Glandular and stromal hyperplasia. | 0                                           |
| 48     | 3                     | 4                       | 7             | Adenocarcinoma. High-grade PIN and BPH.                                    | <5                                          |
| 52     | 4                     | 3                       | 7             | Adenocarcinoma. Glandular hyperplasia and atrophy.                         | 75                                          |
| 57     | 3                     | 4                       | 7             | Adenocarcinoma. Focal glandular hyperplasia.                               | 42                                          |
| 62     | 3                     | 3                       | 6             | Adenocarcinoma. High-grade PIN. Stromal hyperplasia. BPH.                  | 59                                          |
| 63     | 3                     | 3                       | 6             | Adenocarcinoma. High-grade PIN. BPH.                                       | 48                                          |
| 66     | 4                     | 4                       | 8             | Adenocarcinoma. High-grade PIN. Benign prostatic and stromal hyperplasia.  | 2                                           |
| 69     | 3                     | 4                       | 7             | Adenocarcinoma. High-grade PIN. Glandular hyperplasia and atrophy.         | 250                                         |
| 73     | 4                     | 5                       | 9             | Adenocarcinoma. High and low grade PIN. Glandular/stromal hyperplasia.     | 220                                         |
| 76     | 3                     | 3                       | 6             | Adenocarcinoma. High and low grade PIN.                                    | 180                                         |
| 77     | 3                     | 4                       | 7             | Adenocarcinoma                                                             | 300                                         |
| 78     | 3                     | 3                       | 6             | Adenocarcinoma                                                             | 120                                         |
| 79     | 3                     | 4                       | 7             | Adenocarcinoma                                                             | 240                                         |
| 80     | 3                     | 4                       | 7             | Adenocarcinoma                                                             | 0                                           |
| 81     | 4                     | 3                       | 7             | Adenocarcinoma. Small acinar type.                                         | 6                                           |
| 84     | 3                     | 4                       | 7             | Adenocarcinoma                                                             | 86                                          |
| 85     | 3                     | 4                       | 7             | Adenocarcinoma                                                             | 0                                           |
| 86     | 4                     | 4                       | 8             | Adenocarcinoma                                                             | 240                                         |
| 87     | 3                     | 4                       | 7             | Adenocarcinoma                                                             | 350                                         |
| 88     | 3                     | 4                       | 7             | Adenocarcinoma                                                             | 48                                          |
| 90     | 4                     | 3                       | 7             | Adenocarcinoma                                                             | 0                                           |
| 91     | 3                     | 4                       | 7             | Adenocarcinoma                                                             | 80                                          |
| 92     | 4                     | 4                       | 8             | Adenocarcinoma. Conventional.                                              | 0                                           |
| 97     | 3                     | 3                       | 6             | Adenocarcinoma                                                             | 280                                         |
| 99     | 4                     | 4                       | 8             | Adenocarcinoma                                                             | 249                                         |
| 100    | 3                     | 3                       | 6             | Adenocarcinoma                                                             | 238                                         |
| 102    | 3                     | 4                       | 7             | Adenocarcinoma                                                             | 0                                           |
| 105    | 3                     | 4                       | 7             | Adenocarcinoma                                                             | 180                                         |
| 106    | 3                     | 4                       | 7             | Adenocarcinoma                                                             | 90                                          |
| 108    | 4                     | 3                       | 7             | Adenocarcinoma                                                             | 230                                         |
| 109    | 3                     | 5                       | 8             | Adenocarcinoma                                                             | 40                                          |
