# Supplementary material for: Early Human Prostate Adenocarcinomas Harbor Androgen-Independent Cancer Cells
Source: PubMed Central journal article supplement (PMC3783414; doi:10.1371/journal.pone.0074438), 2013-09-25
Supplement: pone.0074438.s008.pdf [file pone.0074438.s008.pdf]

**Supplementary TABLE S2. Reverse Transcriptase PCR Conditions.**

| <b>Transcript/Gene</b>                      | <b>Primer Sequences</b>                                                                                           | <b>Ref Sequence</b>                                | <b>Product</b> |
|---------------------------------------------|-------------------------------------------------------------------------------------------------------------------|----------------------------------------------------|----------------|
| Telomerase Reverse Transcriptase (TERT) [9] | Forward:<br>5'-CAGCTCCCATTTCATCAGCA-3' (nt 2921-2940)<br><br>Reverse:<br>5'-CGACATCCCTGCGTTCTTG-3' (nt 3034-3016) | TERT:<br>NM_001193376.1                            | 114 bp         |
| GAPDH (control) [9]                         | Forward:<br>5'-CGACAGTCAGCCGCATCTT-3' (nt 118-136)<br><br>Reverse:<br>5'-TTCCCCATGGTGTCTGAGC -3' (nt 182-164)     | GAPDH:<br>NM_002046.4                              | 65 bp          |
| TMPRSS2-ERG Fusion [10-13]                  | Forward:<br>5'-TAGGCGCGAGCTAAGCAGGAG-3' (nt 4-24)<br><br>Reverse:<br>5'-GTAGGCACACTCAAACAACGACTGG-3' (nt 362-338) | TMPRSS2:<br>NM_005656.3<br><br>ERG:<br>NM_004449.4 | 126 nt         |
|                                             | Forward:<br>5'-CAGGAGGCGGAGGCGGA (nt 19-35)<br><br>Reverse:<br>5'-GGCGTTGTAGCTGGGGGTGAG-3' (nt 848-828)           | TMPRSS2:<br>NM_005656.3<br><br>ERG:<br>NM_004449.4 | 597 nt         |
